# Supplementary material for: Reviewing Stimulus and System-Specific Differences in Expression Profiles of Methanogenesis Optimized Anaerobic Digestion Transcriptomes
Source: Research Square preprint supplement (doi:10.21203/rs.3.rs-3126182/v1), 2023-07-05
Supplement: Supplementary file 1 [file 3518cdfb58d2d9fe6348a8fe.docx]

| **Table 1: Single-end libraries quality statistics and associated genome information** | | | | | | | | | | |
| --- | --- | --- | --- | --- | --- | --- | --- | --- | --- | --- |
| **Samples**  **Names** | **GC%** | **Length** | **Single-end Library SRA**  **Name** | **Total Bases**  **(Mbp)** | **Total**  **Sequences** | **Assembly** | **Marker**  **Lineage** | **Genomes** | **Complete** | **Contamination** |
| SBA | 53 | 51 | ERR3170088,ERR3170089  ERR3170090 | 1000 | 20882091 | SBAP_003 | Archaea | 207 | 66.76 | 28.87 |
| SBP | 53 | 51 | ERR3170091,ERR3170092  ERR3170093 | 945.5 | 18540383 | SBPP_003 | Archaea | 207 | 35.19 | 12.93 |
| SAA | 48 | 51 | ERR3170073,ERR3170074  ERR3170075 | 625.3 | 12261896 | SAAP_003 | Bacteria | 5449 | 9.97 | 0 |
| SAB | 48 | 51 | ERR3170079,ERR3170080  ERR3170081 | 667.3 | 13086067 | SABP_003 | Archaea | 207 | 2.8 | 0 |
| SAC | 53 | 51 | ERR3170082,ERR3170083  ERR3170084 | 978.5 | 19187050 | SACP_003 | Bacteria | 5449 | 13.38 | 3.45 |
| SAP | 48 | 51 | ERR3170076,ERR3170077  ERR3170078 | 743.4 | 14576828 | SAPP_003 | Archaea | 207 | 10.12 | 0 |
| SAS | 48 | 51 | ERR3170070,ERR3170071  ERR3170072 | 720.1 | 14119731 | SASP_003 | Archaea | 207 | 6.54 | 0 |
| SBB | 54 | 51 | ERR3170094,ERR3170095  ERR3170096 | 1000 | 19615860 | SBBP_003 | Euryarchaeota | 95 | 43.16 | 6.64 |
| SBC | 53 | 51 | ERR3170097,ERR3170098  ERR3170099 | 1000 | 20332162 | SBCP_003 | Archaea | 207 | 39.92 | 14.72 |
| SBS | 54 | 51 | ERR3170085,ERR3170086  ERR3170087 | 983.5 | 19284608 | SBSP_003 | Archaea | 207 | 10.59 | 0 |

| **Table 2:** Quality read alignment of BBBAS3_2 and reads library before and after annotation | | | | | | | | | |
| --- | --- | --- | --- | --- | --- | --- | --- | --- | --- |
| **Sample**  **alignment** | **Coverage mean A** | **Coverage mean B** | **Coverage std A** | **Coverage std B** | **GC%**  **A** | **GC%**  **B** | **Mapping Quality A** | **Mapping Quality B** | **Insert size** |
| SBAP_003 | 39.2896 | 21.0079 | 1385.557 | 1192.294 | 49.03 | 51.28 | 130.1675 | 251.2563 | 0 |
| SBPP_003 | 42.7601 | 22.733 | 1535.579 | 1325.886 | 49.57 | 51.42 | 128.7416 | 251.1146 | 0 |
| SAAP_003 | 72.1602 | 35.5673 | 1467.623 | 760.9424 | 51.88 | 52 | 246.7093 | 253.3767 | 0 |
| SABP_003 | 42.5826 | 24.4983 | 1432.21 | 1274.068 | 49.23 | 51.77 | 137.731 | 251.6813 | 0 |
| SACP_003 | 41.2586 | 23.1647 | 1449.165 | 1316.065 | 48.61 | 51.08 | 133.5959 | 251.4711 | 0 |
| SAPP_003 | 78.4742 | 50.9929 | 1326.898 | 743.4669 | 51.9 | 52.64 | 247.5705 | 253.3551 | 0 |
| SASP_003 | 72.3827 | 43.0445 | 1439.732 | 853.5682 | 51.69 | 52.41 | 248.3103 | 253.3512 | 0 |
| SBBP_003 | 77.0167 | 37.0966 | 1559.877 | 857.6966 | 51.67 | 51.98 | 246.9636 | 253.2941 | 0 |
| SBCP_003 | 63.3705 | 36.499 | 1167.189 | 657.8746 | 51.57 | 51.85 | 246.1922 | 253.3096 | 0 |
| SBSP_003 | 70.5542 | 36.3988 | 1401.358 | 772.2637 | 52.04 | 52.29 | 245.9586 | 253.3039 | 0 |
